# Supplementary material
Source: MDPI journal article supplement (https://www.mdpi.com/2073-4395/13/10/2501)
Supplement: s1 [file s1]

## **Supplementary data**

### **Quantifying CO<sub>2</sub> emissions and carbon sequestration from digestate-amended soil using natural <sup>13</sup>C abundance as a tracer**

**Gregory Reuland <sup>1,2,\*</sup>, Steven Sleutel <sup>3</sup>, Haichao Li <sup>4</sup>, Harmen Dekker <sup>2</sup>, Ivona Sigurnjak <sup>1</sup>, Erik Meers <sup>1</sup>**

<sup>1</sup> Department of Green Chemistry and Technology, Faculty of Bioscience Engineering, Ghent University, Coupure Links 653, 9000 Gent, Belgium

<sup>2</sup> European Biogas Association, Rue d'Arlon 65, 1050 Brussels, Belgium

<sup>3</sup> Department of Environment, Faculty of Bioscience Engineering, Ghent University, Coupure Links 653, 9000 Gent, Belgium

<sup>4</sup> Department of Soil and Environment, Swedish University of Agricultural Sciences, Lennart Hjelm's väg 9, 750 07 Uppsala, Sweden

\* Correspondence: [gregory.reuland@ugent.be](mailto:gregory.reuland@ugent.be)

**Table S1.** Additional soil physicochemical properties.

|           |                     | Loamy sand<br>(S <sub>0.6</sub> ) | Sand<br>(S <sub>0.1</sub> ) |
|-----------|---------------------|-----------------------------------|-----------------------------|
| Ca        | g kg <sup>-1</sup>  | 2.2 ± 0.1                         | 0.9 ± 0.2                   |
| Mg        | g kg <sup>-1</sup>  | 0.0 ± 0.8                         | 1.1 ± 1.1                   |
| Na        | g kg <sup>-1</sup>  | 1.1 ± 1.1                         | 2.9 ± 0.6                   |
| K         | g kg <sup>-1</sup>  | 9.6 ± 0.9                         | 9.3 ± 0.6                   |
| P         | g kg <sup>-1</sup>  | 0.6 ± 0.0                         | 0.1 ± 0.0                   |
| S         | g kg <sup>-1</sup>  | 0.1 ± 0.0                         | 0.0 ± 0.0                   |
| Al        | mg kg <sup>-1</sup> | 7337 ± 158                        | 9399 ± 1046                 |
| Cd        | mg kg <sup>-1</sup> | 0 ± 0                             | 0 ± 0                       |
| Cu        | mg kg <sup>-1</sup> | 0 ± 0                             | 0 ± 0                       |
| Fe        | mg kg <sup>-1</sup> | 6250 ± 222                        | 7756 ± 1085                 |
| Zn        | mg kg <sup>-1</sup> | 0 ± 0                             | 0 ± 0                       |
| OM        | g kg <sup>-1</sup>  | 19.6 ± 0.1                        | 9.4 ± 0.1                   |
| Lignin    | g kg <sup>-1</sup>  | 10.4                              | /                           |
| Cellulose | g kg <sup>-1</sup>  | 38.84                             | /                           |

Ca = calcium; Mg = magnesium; Na = sodium; K = potassium; P = phosphorus; S = sulphur; Al = aluminium; Cd = cadmium; Cu = copper; Fe = iron; Zn = zinc; OM = organic matter.

**Table S2.** Additional physicochemical properties of the exogenous organic matter materials. Results are expressed on dry matter basis.

|    |                     | MZ         | MN         | SF         | DG1        | DG2        |
|----|---------------------|------------|------------|------------|------------|------------|
| P  | g kg <sup>-1</sup>  | 1.6 ± 0.1  | 6.1 ± 0.3  | 8.5 ± 0.2  | 7.1 ± 0.2  | 7.3 ± 0.1  |
| K  | g kg <sup>-1</sup>  | 25.2 ± 0.8 | 28.1 ± 0.6 | 67.2 ± 1.6 | 58.0 ± 3.4 | 66.2 ± 1.1 |
| Mg | g kg <sup>-1</sup>  | 1.9 ± 0.0  | 4.1 ± 0.2  | 6.0 ± 0.2  | 5.3 ± 0.1  | 3.5 ± 0.1  |
| Ca | g kg <sup>-1</sup>  | 4.2 ± 0.1  | 9.2 ± 0.5  | 13.7 ± 0.4 | 11.8 ± 0.2 | 12.0 ± 0.1 |
| S  | g kg <sup>-1</sup>  | 1.6 ± 0.0  | 3.5 ± 0.0  | 4.8 ± 0.0  | 4.1 ± 0.0  | 4.9 ± 0.1  |
| Na | g kg <sup>-1</sup>  | 1.4 ± 0.8  | 4.9 ± 0.3  | 2.1 ± 0.7  | 3.3 ± 0.9  | 1.2 ± 0.2  |
| Al | mg kg <sup>-1</sup> | 331 ± 17   | 1646 ± 175 | 285 ± 29   | 264 ± 24   | 292 ± 6    |
| Cd | mg kg <sup>-1</sup> | 0 ± 0      | 0 ± 0      | 0 ± 0      | 0 ± 0      | 0 ± 0      |
| Cu | mg kg <sup>-1</sup> | 7 ± 0      | 37 ± 2     | 22 ± 0     | 17 ± 1     | 19 ± 1     |
| Fe | mg kg <sup>-1</sup> | 271 ± 14   | 1410 ± 25  | 1227 ± 75  | 995 ± 137  | 2180 ± 161 |
| Zn | mg kg <sup>-1</sup> | 38 ± 4     | 144 ± 5    | 93 ± 5     | 71 ± 2     | 124 ± 3    |

Ca = calcium; Mg = magnesium; Na = sodium; K = potassium; P = phosphorus; S = sulphur; Al = aluminium; Cd = cadmium; Cu = copper; Fe = iron; Zn = zinc. MZ: maize; MN: manure; DG1 and DG2: digestate; SF: the solid fraction of digestate.

**Table S3.** Main parameters of the 2<sup>nd</sup> order kinetic model.

|               | MZ          | MN        | SF        | DG1       | DG2       |
|---------------|-------------|-----------|-----------|-----------|-----------|
| $C_A$         | 58.26720856 | 43.014201 | 15.535273 | 28.349099 | 48.943676 |
| $k_2a(1 - a)$ | 0.001245794 | 0.0020867 | 0.0017778 | 0.0016602 | 0.0004737 |
| $R^2$         | 0.998685    | 0.999129  | 0.988552  | 0.998359  | 0.966804  |
| $p$           | < 0.0001    | < 0.0001  | < 0.0001  | < 0.0001  | < 0.0001  |

$C_A$  = the amount of mineralised C;  $k_2$  = the second-order mineralisation rate;  $a$  = the amount of mineralised C-substrate that becomes part of the microbial biomass;  $R^2$  = coefficient of determination. MZ: maize; MN: manure; DG1 and DG2: digestate; SF: the solid fraction of digestate.

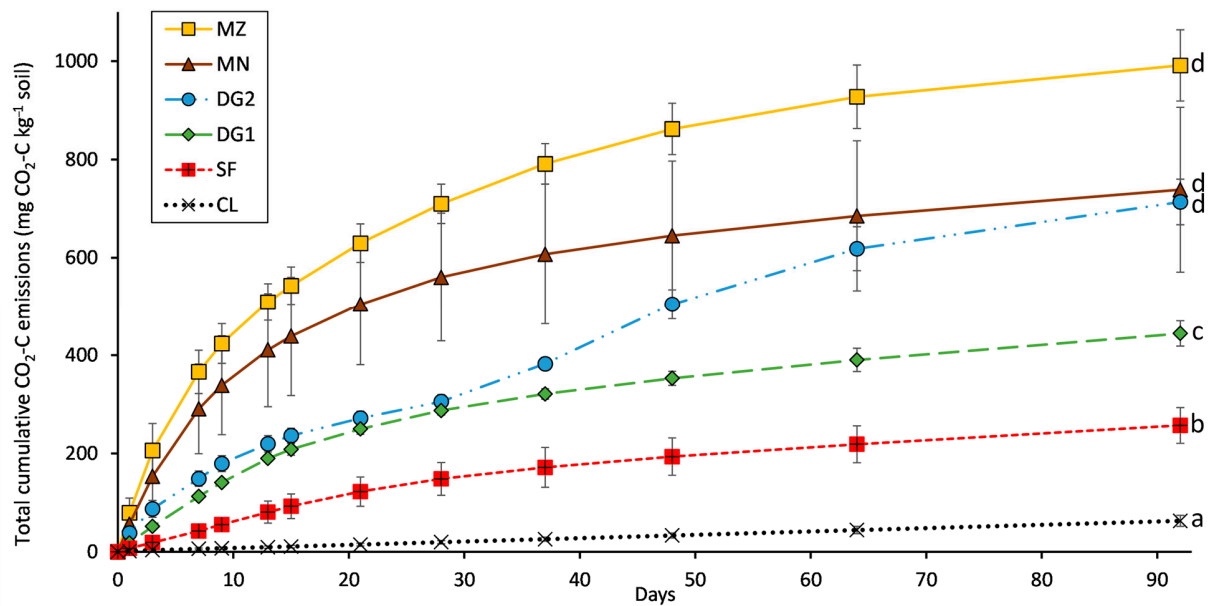

**Figure S1.** Evolution of the total cumulative CO<sub>2</sub>-C from the soil treatments over 92 days. MZ: maize; MN: manure; DG1 and DG2: digestate; SF: the solid fraction of digestate; CL: control soil with no addition of fertiliser.

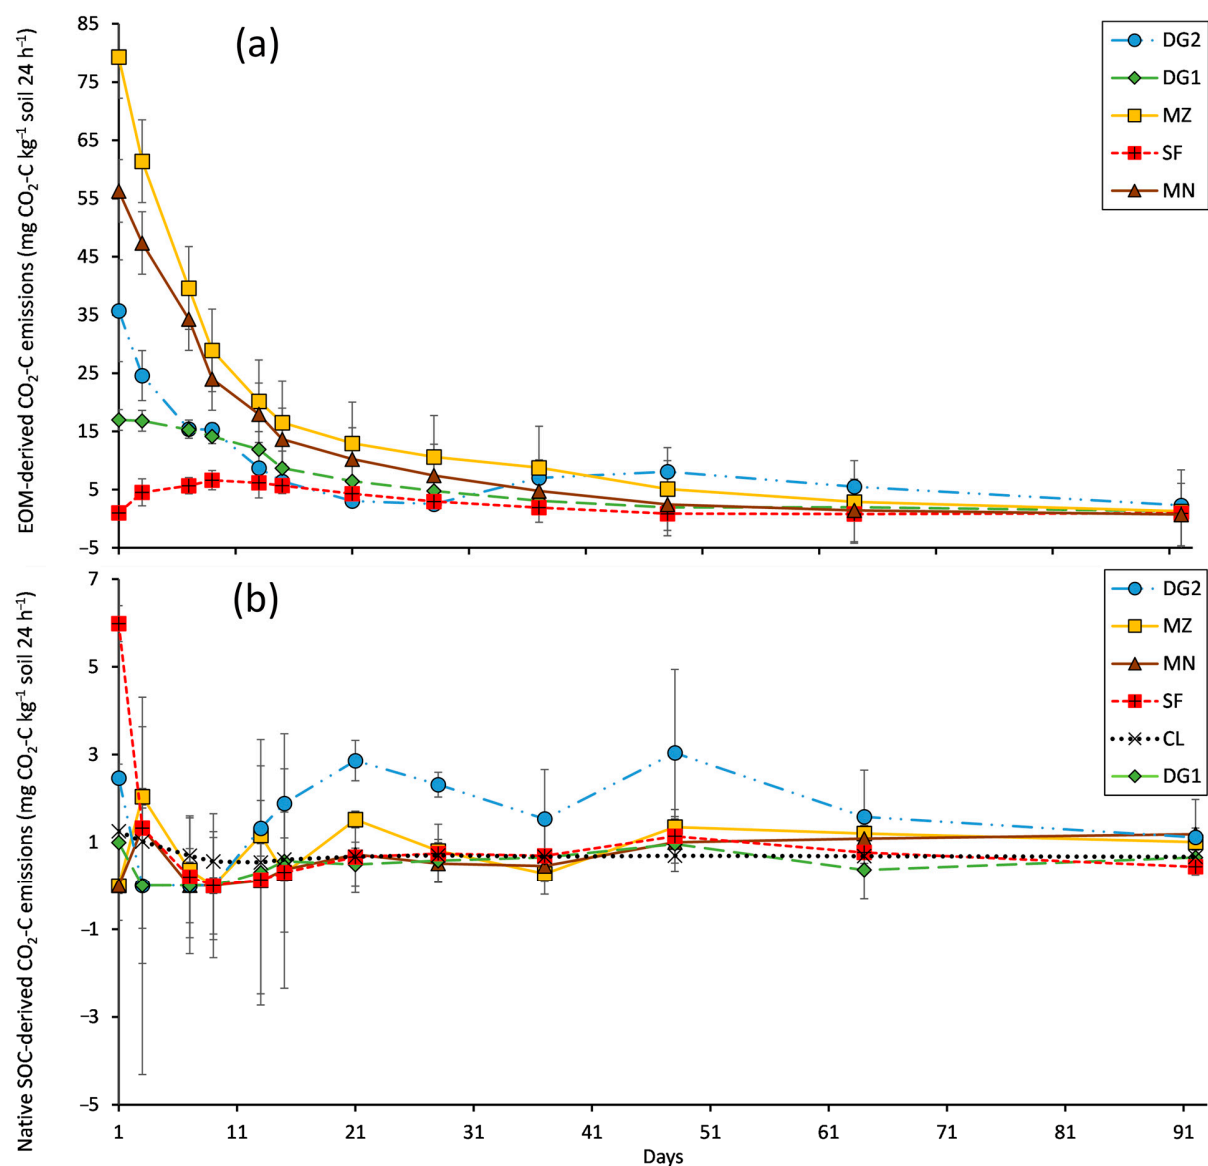

**Figure S2.** Emissions from (a) the EOM-derived CO<sub>2</sub>-C and (b) SOC-derived CO<sub>2</sub>-C expressed as mg CO<sub>2</sub>-C kg<sup>-1</sup> soil 24 h<sup>-1</sup> over 92 days. MZ: maize; MN: manure; DG1 and DG2: digestate; SF: the solid fraction of digestate; CL: control soil with no addition of fertiliser.

**Table S4.** Exogenous organic matter and soil-derived CO<sub>2</sub>-C on last day (92) expressed as mg CO<sub>2</sub>-C kg<sup>-1</sup> soil 24 h<sup>-1</sup>.

|     | EOM-derived<br>(mg CO <sub>2</sub> -C kg <sup>-1</sup> soil 24 h <sup>-1</sup> ) | Soil-derived      |
|-----|----------------------------------------------------------------------------------|-------------------|
| CL  | /                                                                                | 0.67 <sup>a</sup> |
| MZ  | 1.27 <sup>a</sup>                                                                | 1.01 <sup>a</sup> |
| MN  | 0.71 <sup>a</sup>                                                                | 1.18 <sup>a</sup> |
| SF  | 0.94 <sup>a</sup>                                                                | 0.44 <sup>a</sup> |
| DG1 | 1.27 <sup>a</sup>                                                                | 0.65 <sup>a</sup> |
| DG2 | 2.29 <sup>a</sup>                                                                | 1.11 <sup>a</sup> |

MZ: maize; MN: manure; DG1 and DG2: digestate; SF: the solid fraction of digestate; CL: control soil with no addition of fertiliser. Treatments with the same letters are not statistically different according to Tukey's HSD test (significance level of 0.05).

**Table S5.** Amounts of N added with each treatment on first day of experiment.

|     | N input on day 0 (mg kg <sup>-1</sup> soil) |                                 |                  |        |                  |
|-----|---------------------------------------------|---------------------------------|------------------|--------|------------------|
|     | NH <sub>4</sub> <sup>+</sup> -N             | NO <sub>3</sub> <sup>-</sup> -N | N <sub>min</sub> | TN     | N <sub>org</sub> |
| MZ  | 4.64                                        | 3.92                            | 8.56             | 90.61  | 82.05            |
| MN  | 85.27                                       | 0.00                            | 85.27            | 194.18 | 108.91           |
| SF  | 10.43                                       | 0.00                            | 10.43            | 142.17 | 131.74           |
| DG1 | 86.67                                       | 0.00                            | 86.67            | 242.39 | 155.72           |
| DG2 | 190.03                                      | 0.00                            | 190.03           | 396.58 | 206.55           |

TN = total nitrogen; NH<sub>4</sub><sup>+</sup>-N = ammonium nitrogen; NO<sub>3</sub><sup>-</sup>-N = nitrate nitrogen; N<sub>min</sub> = the mineral N taken as the sum of NH<sub>4</sub><sup>+</sup>-N and NO<sub>3</sub><sup>-</sup>-N; N<sub>org</sub> = organic nitrogen.

**Table S6.** Amounts of residual N measured in the soil cores on last day of experiment.

|     | Residual mineral N on day 92 (mg kg <sup>-1</sup> soil) |                                 |                  |                                      |
|-----|---------------------------------------------------------|---------------------------------|------------------|--------------------------------------|
|     | NH <sub>4</sub> <sup>+</sup> -N                         | NO <sub>3</sub> <sup>-</sup> -N | N <sub>min</sub> | N <sub>min</sub><br>(subtracting CL) |
| CL  | 2.04                                                    | 25.55                           | 27.59            | /                                    |
| MZ  | 1.04                                                    | 25.01                           | 26.04            | -1.54                                |
| MN  | 0.52                                                    | 98.21                           | 98.73            | 71.14                                |
| SF  | 0.46                                                    | 36.89                           | 37.35            | 9.76                                 |
| DG1 | 0.40                                                    | 136.09                          | 136.49           | 108.91                               |
| DG2 | 0.39                                                    | 174.20                          | 174.58           | 147.00                               |

NH<sub>4</sub><sup>+</sup>-N = ammonium nitrogen; NO<sub>3</sub><sup>-</sup>-N = nitrate nitrogen; N<sub>min</sub> = the mineral N taken as the sum of NH<sub>4</sub><sup>+</sup>-N and NO<sub>3</sub><sup>-</sup>-N.

**Table S7.** Main results of Pearson's correlations.

|                                                  | Priming | TOC <sub>min-EOM</sub> | DOC/NH <sub>4</sub> <sup>+</sup> -N | DOC/TOC | NH <sub>4</sub> <sup>+</sup> -N <sub>added</sub> | Lignin | Cellulose | pH <sub>D92</sub> | MinN <sub>residual</sub> | pH <sub>EOM</sub> |
|--------------------------------------------------|---------|------------------------|-------------------------------------|---------|--------------------------------------------------|--------|-----------|-------------------|--------------------------|-------------------|
| Priming                                          | 1       |                        |                                     |         |                                                  |        |           |                   |                          |                   |
| TOC <sub>min-EOM</sub>                           | 0.431   | 1                      |                                     |         |                                                  |        |           |                   |                          |                   |
| DOC/NH <sub>4</sub> <sup>+</sup> -N              | 0.003   | 0.673                  | 1                                   |         |                                                  |        |           |                   |                          |                   |
| DOC/TOC                                          | 0.092   | 0.431                  | -0.004                              | 1       |                                                  |        |           |                   |                          |                   |
| NH <sub>4</sub> <sup>+</sup> -N <sub>added</sub> | 0.691   | 0.068                  | -0.578                              | 0.494   | 1                                                |        |           |                   |                          |                   |
| Lignin                                           | 0.064   | -0.706                 | -0.990**                            | -0.027  | 0.606                                            | 1      |           |                   |                          |                   |
| Cellulose                                        | 0.637   | 0.713                  | -0.001                              | 0.354   | 0.554                                            | -0.052 | 1         |                   |                          |                   |
| pH <sub>D92</sub>                                | -0.530  | -0.208                 | 0.468                               | -0.752  | -0.941*                                          | -0.469 | -0.574    | 1                 |                          |                   |
| MinN <sub>residual</sub>                         | 0.469   | -0.054                 | -0.645                              | 0.632   | 0.956*                                           | 0.663  | 0.390     | -0.963**          | 1                        |                   |
| pH <sub>EOM</sub>                                | -0.275  | -0.874                 | -0.831                              | -0.504  | 0.084                                            | 0.824  | -0.325    | 0.097             | 0.125                    | 1                 |

\*\*. Correlation is significant at the 0.01 level (2-tailed).

\*. Correlation is significant at the 0.05 level (2-tailed).
